# Supplementary material
Source: PubMed Central journal article supplement (PMC3077887)

**Supplemental Figure 1:**

Linear regression between the change in transsulfuration rate (TS) and carboxyl-labeled methionine flux ( $Q_C$ ) after vitamin B-6 restriction and the plasma glycine concentration at normal vitamin B-6 status in 9 healthy men and women

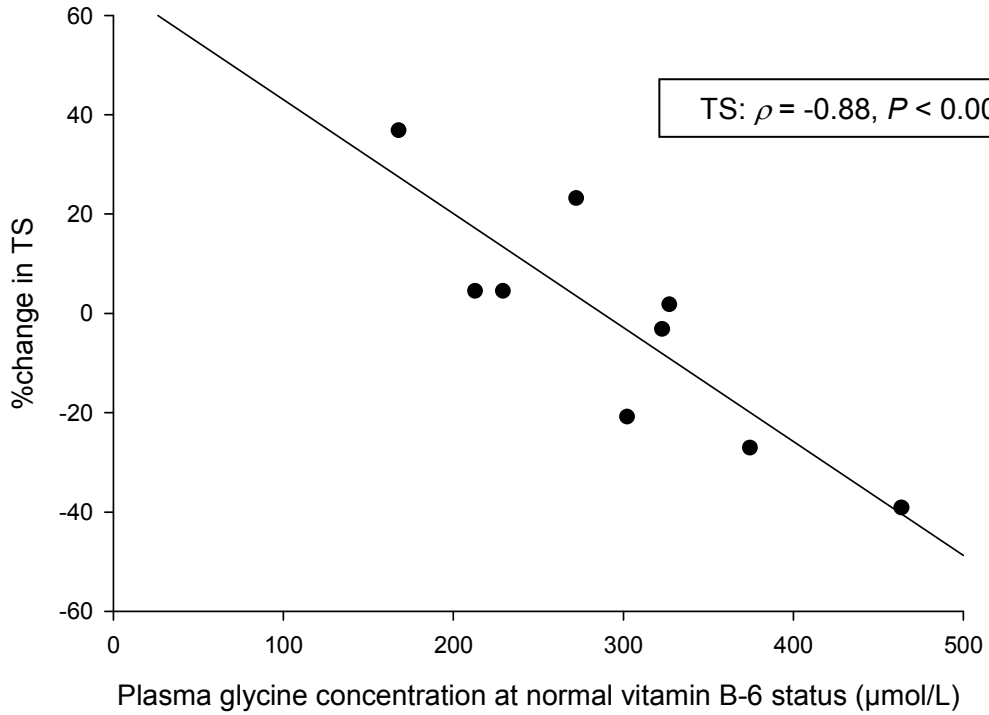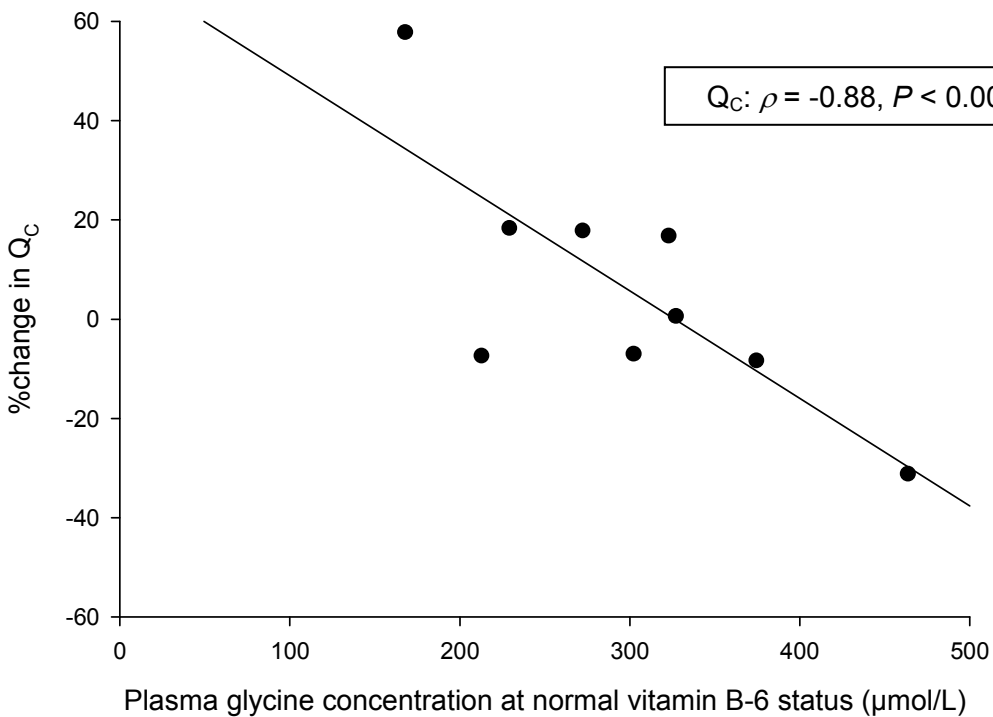

Supplement: supp_jn.110.134197_nut_134197F1.pdf [file supp_jn.110.134197_nut_134197F1.pdf]
