# Supplementary material
Source: PubMed Central journal article supplement (PMC3077887)
Supplement: supp_jn.110.134197_nut_134197SuppMeth.pdf [file supp_jn.110.134197_nut_134197SuppMeth.pdf]

## Supplemental Methods: Kinetic Principles, Calculations and Interpretation

According to *MacCoss et al. (2001)*, for infusion of the [<sup>13</sup>C<sub>1</sub>]methionine tracer, extracellular enrichment is represented by plasma [<sup>13</sup>C<sub>1</sub>]methionine (E<sub>p13C-Met</sub>) and intracellular enrichment is represented by plasma [<sup>13</sup>C<sub>1</sub>]homocysteine (E<sub>p13C-Hcy</sub>). The flux of the [<sup>13</sup>C<sub>1</sub>]methionine tracer was calculated as:

$$Q_C = I_{13C-Met} \cdot ((E_{13C-Met} / E_{p13C-Hcy}) - 1)$$

As the labeled methyl-group is lost during methyltransferase reactions, the intracellular surrogate homocysteine cannot be used for estimation of intracellular [methyl-<sup>2</sup>H<sub>3</sub>]methionine enrichment. The intracellular [methyl-<sup>2</sup>H<sub>3</sub>]methionine enrichment is therefore estimated on the basis of the measured methionine intracellular/extracellular gradient determined from the [<sup>13</sup>C<sub>1</sub>]methionine tracer (E<sub>p13C-Hcy</sub> / E<sub>p13C-Met</sub>), which is used to adjust the plasma [<sup>2</sup>H<sub>3</sub>]methionine enrichment (E<sub>p2H-Met</sub>) to approximate the intracellular [<sup>2</sup>H<sub>3</sub>]methionine enrichment (E<sub>p'2H-Met</sub>).

$$E_{p'2H-Met} = E_{p2H-Met} \cdot (E_{p13C-Hcy} / E_{p13C-Met})$$

With this corrected value for intracellular [<sup>2</sup>H<sub>3</sub>]methionine enrichment, the flux of methyl-labeled methionine is calculated as:

$$Q_M = I_{2H-Met} \cdot ((E_{2H-Met} / E_{p'2H-Met}) - 1)$$

The overall rate of homocysteine remethylation (RM) is then calculated as the difference between the fluxes of the methionine carboxyl and methyl groups:

$$RM = Q_M - Q_C.$$

The rate of production of <sup>13</sup>CO<sub>2</sub> provided a direct and specific measurement of the in vivo whole body flux through amino acid oxidation reactions; in the case of methionine, the release of the [1-<sup>13</sup>C]atom reflects the rate of transsulfuration. The rate of <sup>13</sup>CO<sub>2</sub> release (F<sup>13</sup>CO<sub>2</sub>, in units of μmol·h<sup>-1</sup>·kg<sup>-1</sup> body weight) and the rate of transsulfuration (TS, μmol·h<sup>-1</sup>·kg<sup>-1</sup> body weight) were calculated as follows:

$$F^{13}CO_2 = E^{13}CO_2 \cdot (FCO_2 / 0.81) \cdot (1 / W)$$

where: E<sup>13</sup>CO<sub>2</sub> is breath CO<sub>2</sub> enrichment plateau, FCO<sub>2</sub> is the rate of total CO<sub>2</sub> production, and 0.81 is the assumed fraction of CO<sub>2</sub> release from the body pool of bicarbonate and W is body weight (*Robert et al. 1982*).

$$TS = F^{13}CO_2 / E_{p13C-Hcy}$$

where: F<sup>13</sup>CO<sub>2</sub> is the rate of <sup>13</sup>CO<sub>2</sub> release and E<sub>p13C-Hcy</sub> is the plateau enrichment of [<sup>13</sup>C]homocysteine in plasma.

The rate of methionine uptake for protein synthesis (S) was calculated as: S = Q<sub>C</sub> – TS

The rate of transmethylation (TM) is calculated from TS and RM: TM = TS + RM

### References:

- MacCoss MJ, Fukagawa NK, Matthews DE. Measurement of intracellular sulfur amino acid metabolism in humans. Am J Physiol Endocrinol Metab. 2001 Jun;280:E947-55.*
- Robert JJ, Bier DM, Zhao XH, Matthews DE, Young VR. Glucose and insulin effects on the novo amino acid synthesis in young men: studies with stable isotope labeled alanine, glycine, leucine, and lysine. Metabolism. 1982 Dec;31:1210-8.*
