# Supplementary material
Source: PubMed Central journal article supplement (PMC3077887)
Supplement: supp_jn.110.134197_nut_134197T1.pdf [file supp_jn.110.134197_nut_134197T1.pdf]

**Supplemental Table 1:**

Individual and mean ( $\pm$  SEM) rates of transsulfuration (TS), carboxyl-labeled methionine flux ( $Q_C$ ), methyl-labeled methionine flux ( $Q_M$ ), remethylation (RM), methionine synthesis (S), and transmethylation (TM) before and after dietary vitamin B-6 restriction in 9 healthy young men and women<sup>1</sup>

|                                      |            | Baseline                            |                                      |                                      |                                      |                                      |                                      |                                     | Restricted                          |                                      |                                      |                                      |                                      |                                      |                                     |
|--------------------------------------|------------|-------------------------------------|--------------------------------------|--------------------------------------|--------------------------------------|--------------------------------------|--------------------------------------|-------------------------------------|-------------------------------------|--------------------------------------|--------------------------------------|--------------------------------------|--------------------------------------|--------------------------------------|-------------------------------------|
| Subject                              | Gender     | TS                                  | $Q_C$                                | $Q_M$                                | RM                                   | S                                    | TM                                   | RM/TS                               | TS                                  | $Q_C$                                | $Q_M$                                | RM                                   | S                                    | TM                                   | RM/TS                               |
| 1                                    | male       | 5.2                                 | 24.0                                 | 30.1                                 | 6.1                                  | 18.8                                 | 11.3                                 | 1.2                                 | 5.4                                 | 28.4                                 | 44.5                                 | 16.1                                 | 22.9                                 | 21.6                                 | 3.0                                 |
| 2                                    | male       | 5.6                                 | 29.5                                 | 46.8                                 | 17.2                                 | 24.0                                 | 22.8                                 | 3.1                                 | 5.7                                 | 29.7                                 | 41.4                                 | 11.7                                 | 24.1                                 | 17.3                                 | 2.1                                 |
| 3                                    | male       | 5.1                                 | 26.8                                 | 34.5                                 | 7.6                                  | 21.7                                 | 12.8                                 | 1.5                                 | 3.1                                 | 18.5                                 | 30.7                                 | 12.2                                 | 15.3                                 | 15.4                                 | 3.9                                 |
| 4                                    | male       | 4.3                                 | 25.2                                 | 39.6                                 | 14.4                                 | 20.9                                 | 18.7                                 | 3.3                                 | 5.3                                 | 29.7                                 | 48.2                                 | 18.5                                 | 24.4                                 | 23.8                                 | 3.5                                 |
| Mean<br>$\pm$ SEM                    | male       | 5.1<br>$\pm$ 0.3                    | 26.4<br>$\pm$ 1.2                    | 37.7<br>$\pm$ 3.6                    | 11.4<br>$\pm$ 2.7                    | 21.3<br>$\pm$ 1.1                    | 16.4<br>$\pm$ 2.7                    | 2.3<br>$\pm$ 0.5                    | 4.9<br>$\pm$ 0.6                    | 26.6<br>$\pm$ 2.7                    | 41.2<br>$\pm$ 3.8                    | 14.6<br>$\pm$ 1.6                    | 21.7<br>$\pm$ 2.1                    | 19.5<br>$\pm$ 1.9                    | 3.1<br>$\pm$ 0.4                    |
| 6                                    | female     | 4.9                                 | 25.8                                 | 35.3                                 | 9.5                                  | 20.9                                 | 14.4                                 | 1.9                                 | 5.2                                 | 23.9                                 | 32.6                                 | 8.7                                  | 18.7                                 | 13.9                                 | 1.7                                 |
| 7                                    | female     | 6.9                                 | 26.8                                 | 39.3                                 | 12.6                                 | 19.9                                 | 19.5                                 | 1.8                                 | 5.0                                 | 24.5                                 | 39.8                                 | 15.3                                 | 19.5                                 | 20.4                                 | 3.0                                 |
| 8                                    | female     | 5.5                                 | 23.6                                 | 35.5                                 | 11.9                                 | 18.2                                 | 17.4                                 | 2.2                                 | 4.3                                 | 22.0                                 | 33.1                                 | 11.2                                 | 17.6                                 | 15.5                                 | 2.6                                 |
| 9                                    | female     | 3.8                                 | 16.5                                 | 24.3                                 | 7.9                                  | 12.6                                 | 11.7                                 | 2.1                                 | 5.2                                 | 26.0                                 | 35.5                                 | 9.5                                  | 20.7                                 | 14.8                                 | 1.8                                 |
| 10                                   | female     | 5.4                                 | 22.8                                 | 36.9                                 | 14.2                                 | 17.3                                 | 19.6                                 | 2.6                                 | 5.2                                 | 26.6                                 | 42.7                                 | 16.2                                 | 21.3                                 | 21.4                                 | 3.1                                 |
| Mean<br>$\pm$ SEM                    | female     | 5.3<br>$\pm$ 0.5                    | 23.1<br>$\pm$ 1.8                    | 34.3<br>$\pm$ 2.6                    | 11.2<br>$\pm$ 1.1                    | 17.8<br>$\pm$ 1.4                    | 16.5<br>$\pm$ 1.5                    | 2.1<br>$\pm$ 0.1                    | 5.0<br>$\pm$ 0.2                    | 24.6<br>$\pm$ 0.8                    | 36.8<br>$\pm$ 2.0                    | 12.2<br>$\pm$ 1.5                    | 19.6<br>$\pm$ 0.7                    | 17.2<br>$\pm$ 1.5                    | 2.4<br>$\pm$ 0.3                    |
| <b>Mean<br/><math>\pm</math> SEM</b> | <b>ALL</b> | <b>5.2<br/><math>\pm</math> 0.3</b> | <b>24.5<br/><math>\pm</math> 1.2</b> | <b>35.8<br/><math>\pm</math> 2.1</b> | <b>11.3<br/><math>\pm</math> 1.2</b> | <b>19.4<br/><math>\pm</math> 1.1</b> | <b>16.5<br/><math>\pm</math> 1.3</b> | <b>2.2<br/><math>\pm</math> 0.2</b> | <b>5.0<br/><math>\pm</math> 0.3</b> | <b>25.5<br/><math>\pm</math> 1.2</b> | <b>38.7<br/><math>\pm</math> 2.0</b> | <b>13.3<br/><math>\pm</math> 1.1</b> | <b>20.5<br/><math>\pm</math> 1.0</b> | <b>18.2<br/><math>\pm</math> 1.2</b> | <b>2.7<br/><math>\pm</math> 0.3</b> |

<sup>1</sup> Values are in  $\mu\text{mol}\cdot\text{kg}^{-1}\cdot\text{h}^{-1}$ .
